# Supplementary material
Source: PubMed Central journal article supplement (PMC4033648)
Supplement: cb500071v_si_001.pdf [file cb500071v_si_001.pdf]

**A small molecule compound targeting STAT3 DNA-binding domain inhibits cancer cell proliferation, migration, and invasion**

**Wei Huang, Zizheng Dong, Fang Wang, Hui Peng, Jing-Yuan Liu, and Jian-Ting Zhang**

## Supplemental Figures

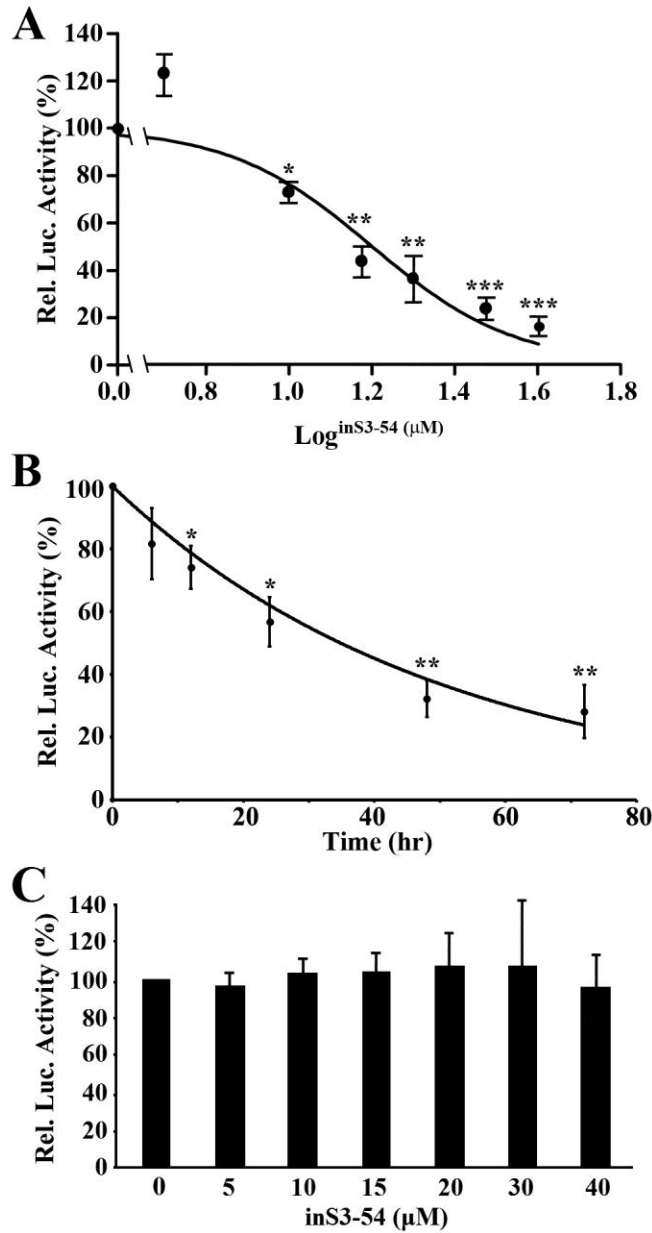

**Figure S1. Effect of inS3-54 on STAT3-dependent and independent luciferase reporter expression.** (A and B). Effect on STAT3-dependent luciferase reporter expression. MDA-MB-231 cells harboring a STAT3-dependent luciferase reporter construct were treated with increasing concentration of inS3-54 for 72 hrs (A) or with 20 μM inS3-54 for various times (B) followed by luciferase reporter assay. (C). Effect on STAT3-independent luciferase expression. H1299 cells were transiently transfected with a luciferase reporter construct driven by a p27 promoter lacking STAT3-binding sequence followed by treatment with different concentrations of inS3-54 for 48 hrs. (\*  $P < 0.05$ , \*\*  $P < 0.01$ , \*\*\*  $P < 0.001$ ).

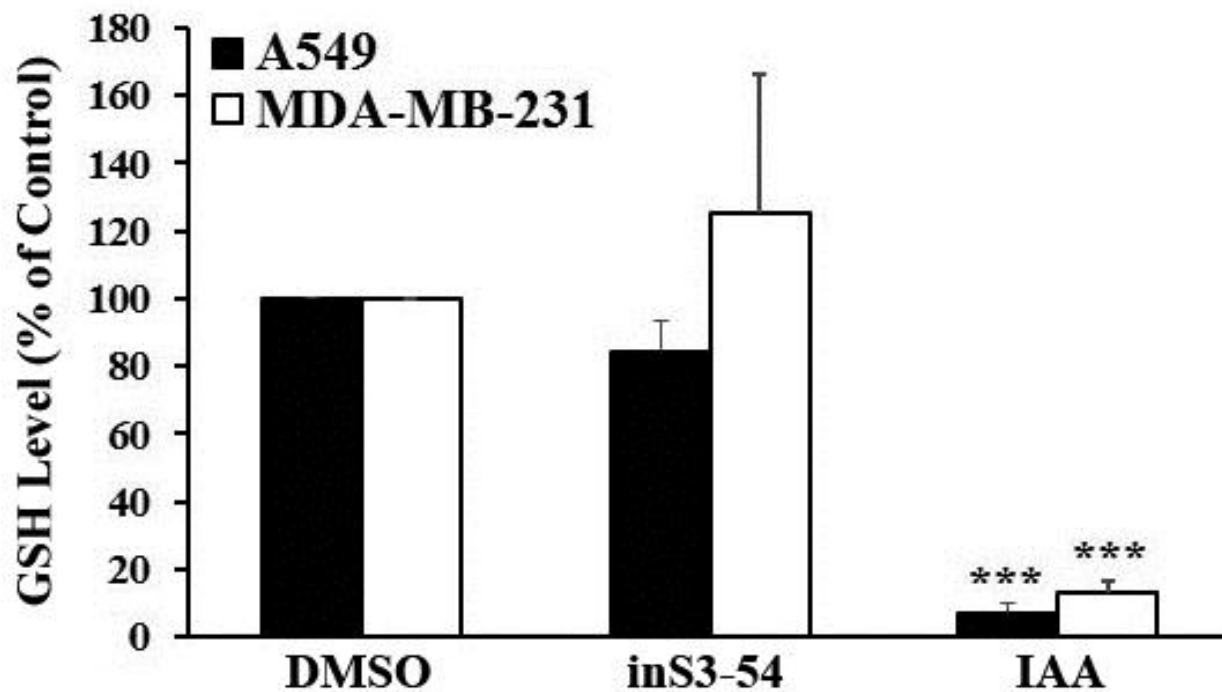

**Figure S2. Effect of inS3-54 glutathione level.** A549 and MDA-MB-231 cells were first treated with DMSO or 20  $\mu$ M inS3-54 for 48 hours or with 15 mM iodoacetamide (IAA) for 30 minutes followed by determination of glutathione level using the GSH-Glo™ glutathione assay kit (Promega, Madison, WI, USA) per manufacturer's instructions. (\*\*\*)  $p < 0.001$ .

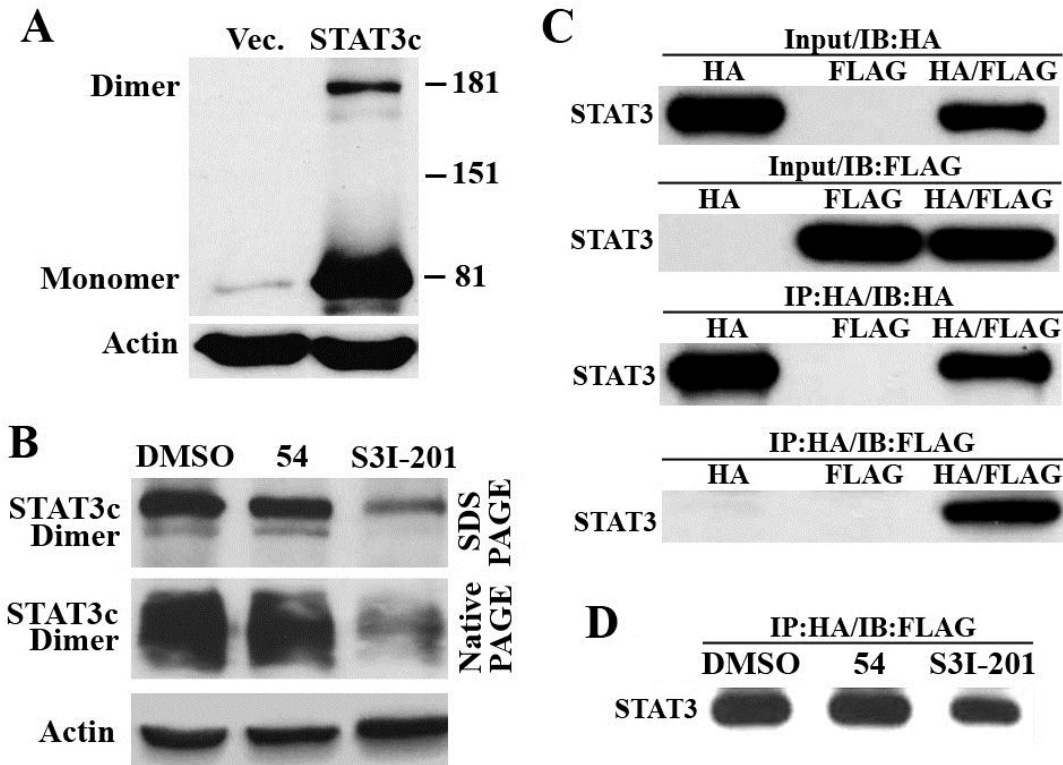

**Figure S3. InS3-54 does not affect STAT3 dimerization.** (A) Western blot analysis of STAT3c expression. H1299 cells were transiently transfected with vector control or STAT3c cDNA followed by lysate preparation, separation by non-reducing SDS-PAGE, and Western blot analysis using STAT3 antibody or actin antibody for a loading control. (B) Western blot analysis of STAT3 dimerization. H1299 cells-expressing STAT3c were treated with DMSO vehicle control, 20  $\mu$ M inS3-54 or S3I-201 for 24 hrs followed by lysate preparation, separation by non-reducing SDS-PAGE or non-denaturing PAGE, and Western blot analysis of STAT3 dimerization status. Actin was used as a loading control. (C) Co-expression and immunoprecipitation of HA- and FLAG-tagged STAT3. Lysates from H1299 cells transfected with HA-tagged, FLAG-tagged STAT3, or both were subjected to co-immunoprecipitation using HA antibody and Western blot analyses with HA or FLAG antibodies as we previously described (*J Biol Chem* 279, 19781-19789). (D) Effect of inS3-54 on co-immunoprecipitation. H1299 cells co-transfected with HA- and FLAG-tagged STAT3 were treated with DMSO control, 20  $\mu$ M inS3-54 or S3I-201 followed by co-immunoprecipitation with HA antibody and Western blot analysis with FLAG antibody.

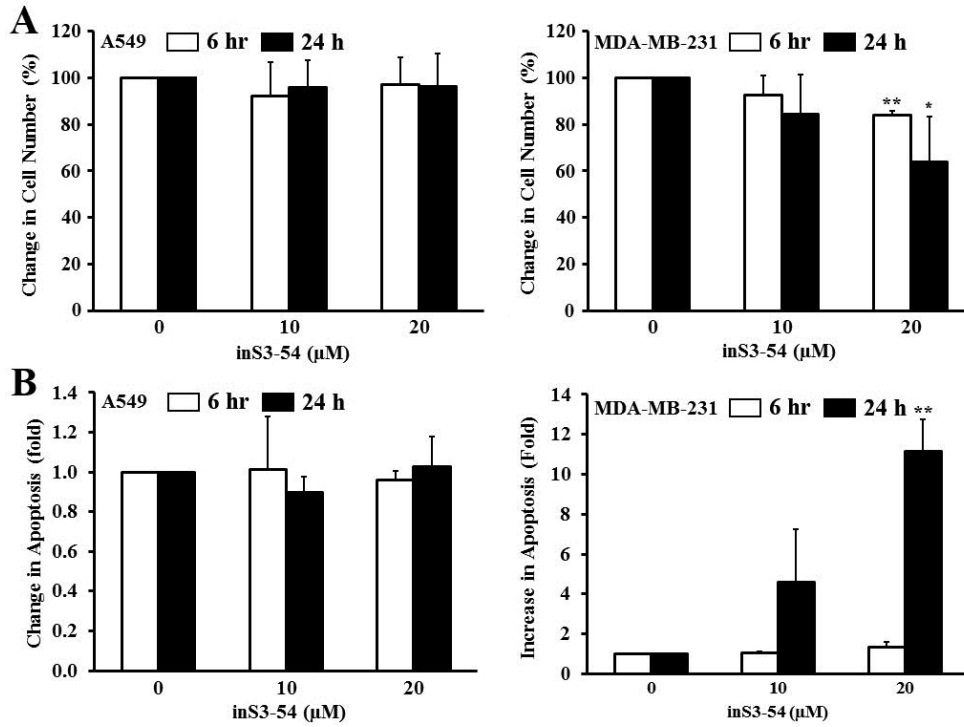

**Figure S4. Effect of inS3-54 on cell growth and apoptosis of confluent cells.** 100% confluent A549 and MDA-MB-231 cells were treated with 0 (DMSO vehicle control), 10 or 20 μM inS3-54 for 6 or 24 hrs followed by determination of change in cell number for proliferation (A) or ELISA for apoptosis (B). (\*\*  $p < 0.01$ ; \* $p < 0.05$ ).

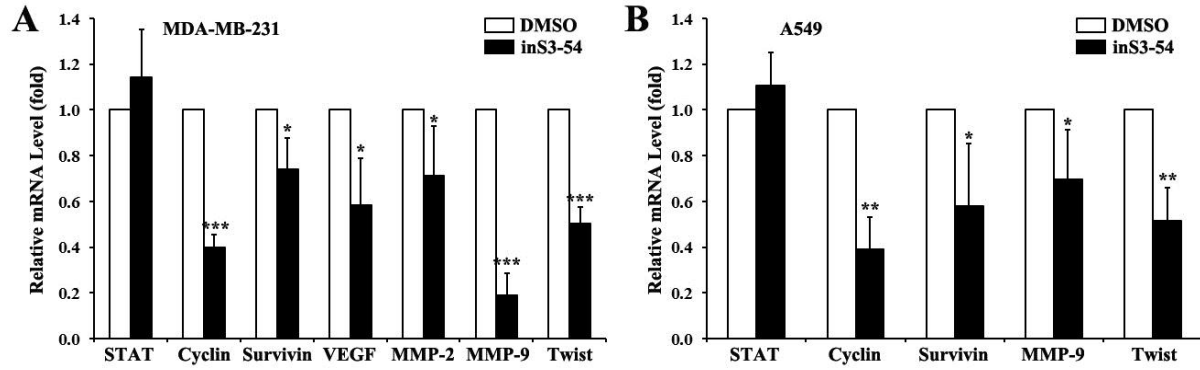

**Figure S5. Effect of inS3-54 on mRNA level of STAT3 downstream target genes.** MDA-MB-231 (A) and A549 (B) cells were treated with DMSO control or 20  $\mu$ M inS3-54 followed by extracting total RNA and real-time RT-PCR analysis. InS3-54 inhibited mRNA level of STAT3 downstream targets in both cells lines. (\*  $P < 0.05$ , \*\*  $P < 0.01$ , \*\*\*  $P < 0.001$ ).

### Supplemental Table

Table S1. Primers for real-time PCR.

|          |                                                      |
|----------|------------------------------------------------------|
| STAT3    | F: GGCCCCTCGTCATCAAGA<br>R: TTTGACCAGCAACCTGACTTTAGT |
| CyclinD1 | F: CTCCTCTCCAAAATGCCAG<br>R: AGAGATGGAAGGGGGAAAGA    |
| Survivin | F: TGCCTGGCAGCCCTTTC<br>R: CCTCCAAGAAGGGCCAGTTC      |
| VEGF     | F: TACCTCCACCATGCCAAGTG<br>R: GATGATTCTGCCCTCCTCCTT  |
| MMP-1    | F: AGCTAGCTCAGGATGACATTGATG<br>R: GCCGATGGGCTGGACAG  |
| MMP-2    | F: TAGCATGTCCCTACCGAGTCT<br>R: ATTGGATGGCAGTAGCTGC   |
| MMP-9    | F: TGACAGCGACAAGAAGTG<br>R: CAGTGAAGCGGTACATAGG      |
| MMP-10   | F: ATCCAAGAGGCATCCATACC<br>R: TCAACCTTAGGCTCAACTCC   |
| Twist    | F: CGGGAGTCCGCAGTCTTA<br>R: TGAATCTTGCTCAGCTTGTC     |
| GAPDH    | F: AAGGACTCATGACCACAGTCCAT<br>R: CCATCACGCCACAGTTTCC |
